# Supplementary material for: Chronic Hyperglycemia Induces Trans-Differentiation of Human Pancreatic Stellate Cells and Enhances the Malignant Molecular Communication with Human Pancreatic Cancer Cells
Source: PubMed Central journal article supplement (PMC4444240; doi:10.1371/journal.pone.0128059), 2015-05-26
Supplement: pone.0128059.s001.pdf [file pone.0128059.s001.pdf]

# RLT-PSC

## CXCL12

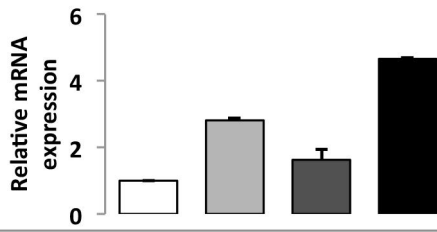

| Glucose (mM) | 5.5 | 15.3 | 5.5 | 15.3 |
|--------------|-----|------|-----|------|
| TGF-β1       | -   | -    | +   | +    |

## Col5a1

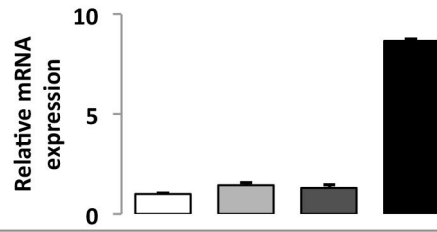

| Glucose (mM) | 5.5 | 15.3 | 5.5 | 15.3 |
|--------------|-----|------|-----|------|
| TGF-β1       | -   | -    | +   | +    |

## cFOS

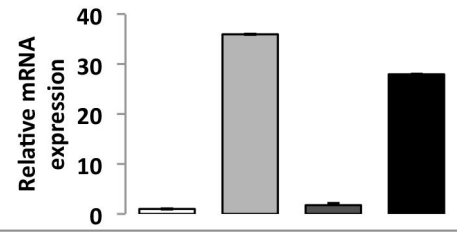

| Glucose (mM) | 5.5 | 15.3 | 5.5 | 15.3 |
|--------------|-----|------|-----|------|
| TGF-β1       | -   | -    | +   | +    |

## DPP4

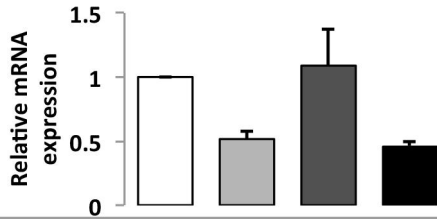

| Glucose (mM) | 5.5 | 15.3 | 5.5 | 15.3 |
|--------------|-----|------|-----|------|
| TGF-β1       | -   | -    | +   | +    |

## THBS1

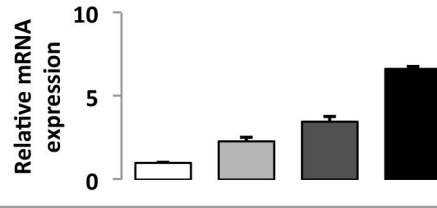

| Glucose (mM) | 5.5 | 15.3 | 5.5 | 15.3 |
|--------------|-----|------|-----|------|
| TGF-β1       | -   | -    | +   | +    |

## RND3

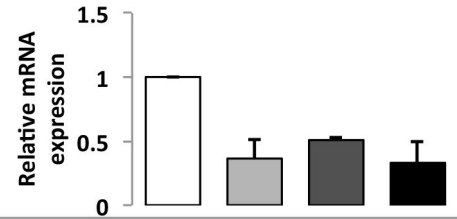

| Glucose (mM) | 5.5 | 15.3 | 5.5 | 15.3 |
|--------------|-----|------|-----|------|
| TGF-β1       | -   | -    | +   | +    |

## PPARγ

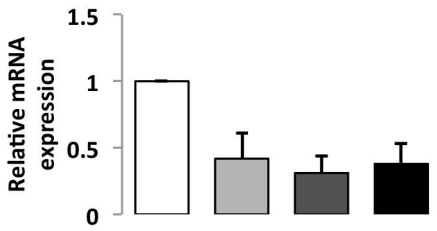

| Glucose (mM) | 5.5 | 15.3 | 5.5 | 15.3 |
|--------------|-----|------|-----|------|
| TGF-β1       | -   | -    | +   | +    |

## VCAN

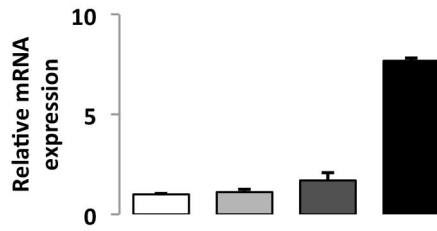

| Glucose (mM) | 5.5 | 15.3 | 5.5 | 15.3 |
|--------------|-----|------|-----|------|
| TGF-β1       | -   | -    | +   | +    |

## LTBP2

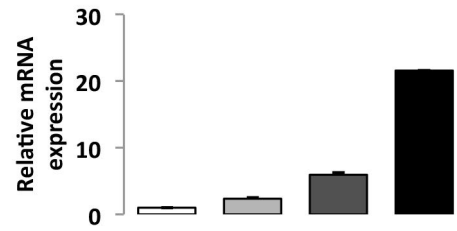

| Glucose (mM) | 5.5 | 15.3 | 5.5 | 15.3 |
|--------------|-----|------|-----|------|
| TGF-β1       | -   | -    | +   | +    |

## MMP1

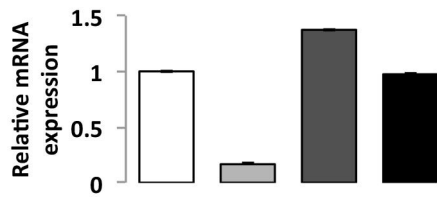

| Glucose (mM) | 5.5 | 15.3 | 5.5 | 15.3 |
|--------------|-----|------|-----|------|
| TGF-β1       | -   | -    | +   | +    |
