# Supplementary material for: Chronic Hyperglycemia Induces Trans-Differentiation of Human Pancreatic Stellate Cells and Enhances the Malignant Molecular Communication with Human Pancreatic Cancer Cells
Source: PubMed Central journal article supplement (PMC4444240; doi:10.1371/journal.pone.0128059), 2015-05-26
Supplement: pone.0128059.s002.pdf [file pone.0128059.s002.pdf]

**RLT-PSC**

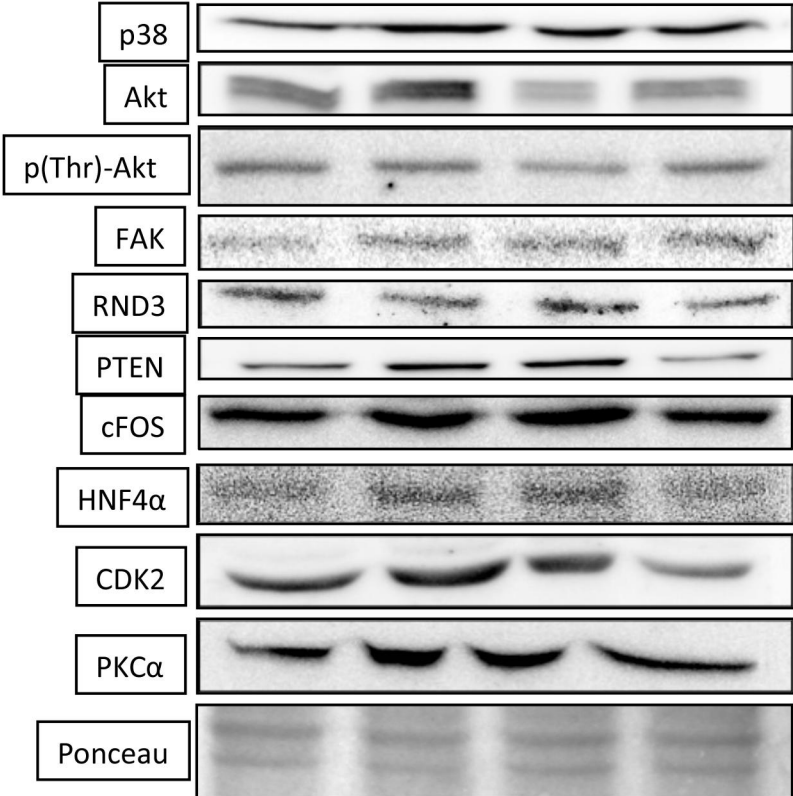

|                     |            |             |            |             |
|---------------------|------------|-------------|------------|-------------|
| <b>Glucose (mM)</b> | <b>5.5</b> | <b>15.3</b> | <b>5.5</b> | <b>15.3</b> |
| <b>TGFβ</b>         | <b>-</b>   | <b>-</b>    | <b>+</b>   | <b>+</b>    |
