# Supplementary material for: Chronic Hyperglycemia Induces Trans-Differentiation of Human Pancreatic Stellate Cells and Enhances the Malignant Molecular Communication with Human Pancreatic Cancer Cells
Source: PubMed Central journal article supplement (PMC4444240; doi:10.1371/journal.pone.0128059), 2015-05-26
Supplement: pone.0128059.s004.pdf [file pone.0128059.s004.pdf]

| <b>Gene name abbreviation</b> | <b>Gene name</b>                                         | <b>Gene function (as indicated in the NCBI/NLM/NIH)</b>                           | <b>Assay ID</b> |
|-------------------------------|----------------------------------------------------------|-----------------------------------------------------------------------------------|-----------------|
| CXCL12                        | Chemokine (C-X-C Motif)<br>Ligand 12                     | ligand for the G-protein coupled receptor, chemokine (C-X-C motif) receptor 4     | Hs00171022_m1   |
| COL5A1                        | collagen, type V, alpha 1                                | regulate the assembly of heterotypic fibers                                       | Hs00609088_m1   |
| FOS                           | FBJ murine osteosarcoma viral oncogene homolog           | forming the transcription factor complex AP-1 with proteins of the JUN family     | Hs04194186_s1   |
| DPP4                          | dipeptidyl-peptidase 4                                   | serine exopeptidase                                                               | Hs00175210_m1   |
| RND3                          | Rho family GTPase 3                                      | negative regulator of cytoskeletal organization                                   | Hs01003594_m1   |
| PPARG                         | peroxisome proliferator-activated receptor gamma         | regulator of adipocyte differentiation                                            | Hs01115513_m1   |
| VCAN                          | versican                                                 | role in cell adhesion, proliferation, migration and angiogenesis                  | Hs00171642_m1   |
| LTBP2                         | latent transforming growth factor beta binding protein 2 | member of the TGF-beta latent complex                                             | Hs00166367_m1   |
| MMP1                          | matrix metallopeptidase 1                                | unbuid extracellular martix                                                       | Hs00899658_m1   |
| THBS1                         | thrombospondin 1                                         | adhesive glycoprotein that mediuptes cell-to-cell and cell-to-matrix interactions | Hs00962908_m1   |
