# Supplementary material for: Chronic Hyperglycemia Induces Trans-Differentiation of Human Pancreatic Stellate Cells and Enhances the Malignant Molecular Communication with Human Pancreatic Cancer Cells
Source: PubMed Central journal article supplement (PMC4444240; doi:10.1371/journal.pone.0128059), 2015-05-26
Supplement: pone.0128059.s005.pdf [file pone.0128059.s005.pdf]

| <b>Antibody specificity</b>        | <b>Clonality</b>  | <b>Manufacturer</b> | <b>Cat No</b> | <b>Dilution used</b> |
|------------------------------------|-------------------|---------------------|---------------|----------------------|
| Anti-Collagen I antibody           | Rabbit Polyclonal | Abcam, UK           | AB34710       | 1:1000               |
| Anti-Collagen III antibody         | Rabbit Polyclonal | Abcam, UK           | AB 7778       | 1:1000               |
| Anti-Rabbit<br>Immunoglobulins/HRP | Goat polyclonal   | DAKO                | P0448         | 1:2000               |
