# Supplementary material for: Chronic Hyperglycemia Induces Trans-Differentiation of Human Pancreatic Stellate Cells and Enhances the Malignant Molecular Communication with Human Pancreatic Cancer Cells
Source: PubMed Central journal article supplement (PMC4444240; doi:10.1371/journal.pone.0128059), 2015-05-26
Supplement: pone.0128059.s006.pdf [file pone.0128059.s006.pdf]

| <b>Antibody specificity</b>                     | <b>Clonality</b>     | <b>Manufacturer</b>  | <b>Cat No</b> | <b>Dilution used</b> |
|-------------------------------------------------|----------------------|----------------------|---------------|----------------------|
| Anti-Collagen I antibody                        | Rabbit<br>Polyclonal | Abcam, UK            | AB34710       | 1:100                |
| Alpha-Actin (Smooth Muscle)<br>(ACTA2) antibody | Monoclonal<br>(E184) | Epitomics<br>(AbCam) | 5264          | 1:1000               |
| Alexa Fluor 488 donkey anti-rabbit<br>IgG (H+L) | Polyclonal           | Invitrogene          | A21206        | 1:200                |
