# Supplementary material for: Chronic Hyperglycemia Induces Trans-Differentiation of Human Pancreatic Stellate Cells and Enhances the Malignant Molecular Communication with Human Pancreatic Cancer Cells
Source: PubMed Central journal article supplement (PMC4444240; doi:10.1371/journal.pone.0128059), 2015-05-26
Supplement: pone.0128059.s007.pdf [file pone.0128059.s007.pdf]

| <b>Antibody specificity</b>                    | <b>Clonality</b>              | <b>Manufacturer</b> | <b>Cat No</b> | <b>Dilution used</b> |
|------------------------------------------------|-------------------------------|---------------------|---------------|----------------------|
| <b>Anti-p38 antibody</b>                       | Rabbit Polyclonal             | Cell Signaling      | 9212          | 1:100                |
| <b>Anti-p(Thr180/Tyr182)-p38 antibody</b>      | Rabbit monoclonal (D3F9)      | Cell Signaling      | 4511          | 1:500                |
| <b>Anti-p(Thr202/Tyr204)-p44/42 antibody</b>   | Rabbit monoclonal (D13.14.4E) | Cell Signaling      | 4370          | 1:2000               |
| <b>Anti-Akt (pan) antibody</b>                 | Monoclonal (C67E7)            | Cell Signaling      | 4691          | 1:250                |
| <b>Anti-p(Thr308)-Akt antibody</b>             | Monoclonal (C31E5E)           | Cell Signaling      | 2965          | 1:500                |
| <b>Anti-p(Ser473)-Akt antibody</b>             | Monoclonal (193H12)           | Cell Signaling      | 4058          | 1:500                |
| <b>Anti-FAK antibody</b>                       | Rabbit Polyclonal             | Cell Signaling      | 3285          | 1:500                |
| <b>Anti-RND3 antibody</b>                      | Mouse monoclonal (4)          | Abcam, UK           | AB50316       | 1:250                |
| <b>Anti-PTEN antibody</b>                      | Rabbit monoclonal (D4.3)      | Cell Signaling      | 9188          | 1:600                |
| <b>Anti-cFOS antibody</b>                      | Rabbit Polyclonal             | Abcam, UK           | AB7963        | 1:400                |
| <b>Anti-p21 antibody</b>                       | Rabbit Polyclonal             | Abcam, UK           | AB7960        | 1:1000               |
| <b>Anti-PPAR<math>\gamma</math> antibody</b>   | Rabbit Polyclonal             | Abcam, UK           | AB118521      | 1:200                |
| <b>Anti-CDC25a antibody</b>                    | Mouse Monoclonal (DCS-120)    | Santa Cruz          | Sc-56264      | 1:200                |
| <b>Anti-SP-1 antibody</b>                      | Rabbit Polyclonal             | Cell Signaling      | 5931          | 1:1000               |
| <b>Anti-HIF1a antibody</b>                     | Rabbit Polyclonal             | Cell Signaling      | 3716          | 1:500                |
| <b>Anti-HNF4a (G162) antibody</b>              | Rabbit Polyclonal             | Cell Signaling      | 3117          | 1:1000               |
| <b>Anti-CDK2 antibody</b>                      | Rabbit Polyclonal             | Sigma               | C5223         | 1:1000               |
| <b>Anti-PKCa antibody</b>                      | Rabbit Polyclonal             | Cell Signaling      | 2056          | 1:750                |
| <b>Anti-O-GlcNAc antibody</b>                  | Mouse monoclonal (CTD110.6)   | Cell Signaling      | 9875          | 1:1000               |
| <b>Anti-Glucose Transporter GLUT1 antibody</b> | Rabbit Polyclonal             | Abcam, UK           | AB652         | 1:500                |
| <b>Anti-Glucose Transporter GLUT2 antibody</b> | Rabbit Polyclonal             | Abcam, UK           | AB54460       | 1:500                |
| <b>Anti-Glucose Transporter GLUT3 antibody</b> | Rabbit Polyclonal             | Abcam, UK           | AB41525       | 1:2000               |
| <b>Anti-Glucose Transporter GLUT4 antibody</b> | Rabbit Polyclonal             | Abcam, UK           | AB654         | 1:2000               |
| <b>Anti-CXCR4 antibody</b>                     | Rabbit Polyclonal             | Abcam, UK           | AB2074        | 1:500                |
| <b>Anti-CXCR7 antibody</b>                     | Goat polyclonal               | Santa Cruz          | Sc-107515     | 1:200                |
| <b>Anti-Rabbit Immunoglobulins/HRP</b>         | Goat polyclonal               | DAKO                | P0448         | 1:2000               |
| <b>Anti-Goat Immunoglobulins/HRP</b>           | Rabbit polyclonal             | DAKO                | P0449         | 1:2000               |
| <b>Anti-Mouse Immunoglobulins/HRP</b>          | Goat polyclonal               | DAKO                | P0447         | 1:2000               |
